# Supplementary material for: Simulation of the Performance and Scalability of MPICommunications of Atmospheric Models running onExascale Supercomputers
Source: Copernicus journal article supplement (doi:10.5194/gmd-2017-301), 2018-01-22
Supplement: Supplementary file [file gmd-2017-301-AC1-supplement.pdf]

# Simulation of the Performance and Scalability of MPI Communications of Atmospheric Models running on Exascale Supercomputers

Yongjun ZHENG <sup>\*1</sup> and Philippe MARGUINAUD<sup>1</sup>

<sup>1</sup>*Centre National de Recherches Météorologiques, Météo France, Toulouse 31057*

March 19, 2018

## Abstract

In this study, we identify the key MPI operations required in atmospheric modelling; then, we use a skeleton program and a simulation framework (based on SST/macro simulation package) to simulate these MPI operations (transposition, halo exchange, and allreduce), with the perspective of future exascale machines in mind. The experimental results show that the choice of the collective algorithm has a great impact on the performance of communications, in particular we find that the generalized ring-k algorithm for the alltoallv operation and the generalized recursive-k algorithm for the allreduce operation perform the best. In addition, we observe that the impacts of interconnect topologies and routing algorithms on the performance and scalability of transpositions, halo exchange, and allreduce operations are significant, however, that the routing algorithm has a negligible impact on the performance of allreduce operations because of its small message size. It is impossible to infinitely grow bandwidth and reduce latency due to hardware limitations, thus, congestion may occur and limit the continuous improvement of the performance of communications. The experiments show that the performance of communications can be improved when congestion is mitigated by a proper configuration of the topology and routing algorithm, which uniformly distribute the congestion over

---

\*Corresponding author: yongjun.zheng@meteo.fr

18 the interconnect network to avoid the hotspots and bottlenecks caused by congestion. It  
19 is generally believed that the transpositions seriously limit the scalability of the spectral  
20 models. The experiments show that although the communication time of the transposi-  
21 tion is larger than those of the wide halo exchange for the Semi-Lagrangian method and  
22 the allreduce in the GCR iterative solver for the Semi-Implicit method below  $2 \times 10^5$  MPI  
23 processes, the transposition whose communication time decreases quickly as the number  
24 of MPI processes increases demonstrates strong scalability in the case of very large grids  
25 and moderate latencies; the halo exchange whose communication time decreases more  
26 slowly than that of transposition as the number of MPI processes increases reveals its  
27 weak scalability; in contrast, the allreduce whose communication time increases as the  
28 number of MPI processes increases does not scale well. From this point of view, the scal-  
29 ability of the spectral models could still be acceptable, therefore it seems to be premature  
30 to conclude that the scalability of the grid-point models is better than that of spectral  
31 models at exascale, unless innovative methods are exploited to mitigate the problem of  
32 the scalability presented in the grid-point models.

33 **Keyword:** performance, scalability, MPI, communication, transposition, halo exchange,  
34 all reduce, topology, routing, bandwidth, latency

## 35 1 Introduction

36 Current high performance computing (HPC) systems have thousands of nodes and millions  
37 of cores. According to the 49th TOP500 list ([www.top500.org](http://www.top500.org)) published on June 20, 2017,  
38 the fastest machine (Sunway TaihuLight) had over than 10 million cores with a peak perfor-  
39 mance approximately 125 PFlops (1 PFlops= $10^{15}$  floating-point operations per second), and  
40 the second HPC (Tianhe-2) is made up of 16,000 nodes and has more than 3 million cores with  
41 a peak performance approximately 55 PFlops. It is estimated that in the near future, HPC  
42 systems will dramatically scale up in size. Next decade, it is envisaged that exascale HPC  
43 system with millions of nodes and thousands of cores per node, whose peak performance ap-  
44 proaches to or is beyond 1 EFlops (1 EFlops= $10^3$  PFlops), will become available (Engelmann,  
45 2014; Lagadapati et al., 2016). Exascale HPC poses several challenges in terms of power con-  
46 sumption, performance, scalability, programmability, and resilience. The interconnect net-  
47 work of exascale HPC system becomes larger and more complex, and its performance which  
48 largely determines the overall performance of the HPC system is crucial to the performance

49 of distributed applications. Designing energy-efficient cost-scalable interconnect networks and  
50 communication-efficient scalable distributed applications is an important component of HPC  
51 hardware/software co-design to address these challenges. Thus, evaluating and predicting the  
52 communication behaviour of distributed applications is obligatory; it is only feasible by mod-  
53 elling the communications and the underlying interconnect network, especially for the future  
54 supercomputer.

55 Investigating the performance of distributed applications on future architectures and the  
56 impact of different architectures on the performance by simulation is a hardware/software  
57 co-design approach for paving the way to exascale HPCs. Analytical interconnect network sim-  
58 ulation based on an analytical conceptual model is fast and scalable, but comes at the cost of  
59 accuracy owing to its unrealistic simplification (Hoeffler et al., 2010). Discrete event simulation  
60 (DES) is often used to simulate the interconnect network, and it provides high fidelity since the  
61 communication is simulated in more detailed level (e.g., flit, packet, or flow levels) to take into  
62 account congestion (Janssen et al., 2010; Böhm and Engelmann, 2011; Dechev and Ahn, 2013;  
63 Acun et al., 2015; Jain et al., 2016; Wolfe et al., 2016; Degomme et al., 2017; Mubarak et al.,  
64 2017). Sequential DES lacks scalability owing to its large memory footprints and long exe-  
65 cution time (Degomme et al., 2017). Parallel DES (PDES) is scalable since it can reduce the  
66 memory required per node, but its parallel efficiency is not very good because of frequent  
67 global synchronization of conservative PDES (Janssen et al., 2010) or high rollback overhead of  
68 optimistic PDES (Acun et al., 2015; Jain et al., 2016; Wolfe et al., 2016). Generally, the simu-  
69 lation of distributed applications can be divided into two complementary categories: offline and  
70 online simulations. Offline simulation replays the communication traces from the application  
71 running on a current HPC system. It is sufficient to understand the performance and dis-  
72 cover the bottleneck of full distributed applications on the available HPC system (Tikir et al.,  
73 2009; Noeth et al., 2009; Núñez et al., 2010; Dechev and Ahn, 2013; Casanova et al., 2015;  
74 Acun et al., 2015; Jain et al., 2016; Lagadapati et al., 2016); however, is not very scalable be-  
75 cause of the huge traces for numerous processes and limited extrapolation to future architecture  
76 (Hoeffler et al., 2010; Núñez et al., 2010). Online simulation has full scalability to future system  
77 by running the skeleton program on the top of simulators (Zheng et al., 2004; Janssen et al.,  
78 2010; Engelmann, 2014; Degomme et al., 2017), but has the challenge of developing a skele-  
79 ton program from a complex distributed application. Most simulations in the aforementioned  
80 literatures have demonstrated the scalability of simulators. The simulator xSim (Engelmann,

81 2014) simulated a very simple MPI program, which only calls MPI\_Init and MPI\_Finalize with-  
82 out any communication and computation, up to  $2^{27}$  processes. For collective MPI operations,  
83 Hoeﬂer et al. (2010) obtained an MPI\_Allreduce simulation of 8 million processes without con-  
84 sideration of congestion using LogGOPSim, Engelmann (2014) achieved an MPI\_Reduce simula-  
85 tion of  $2^{24}$  processes, and Degomme et al. (2017) demonstrated an MPI\_Allreduce simulation of  
86 65536 processes using SimGrid. For simulations at application level, Jain et al. (2016) used the  
87 TraceR simulator based on CODES and ROSS to replay  $4.6 \times 10^4$  process traces of several com-  
88 munication patterns that are used in a wide range of applications. In addition, Mubarak et al.  
89 (2017) presented a  $1.1 \times 10^5$  process simulations of two multigrid applications. However, to  
90 the best of our knowledge, there is no exascale simulation of complex communication patterns  
91 such as the MPI transposition (Multiple simultaneous MPI\_Alltoallv) for the spectral method  
92 and the wide halo exchange (the width of a halo may be greater than the subdomain size of its  
93 direct neighbours) for the Semi-Lagrangian method used in atmospheric models.

94 With the rapid development of increasingly powerful supercomputers in recent years, numer-  
95 ical weather prediction (NWP) models have increasingly sophisticated physical and dynamical  
96 processes, and their resolution is getting higher and higher. Nowadays, the horizontal resolution  
97 of global NWP model is in the order of 10 kilometres. Many operational global spectral NWP  
98 models such as IFS at ECMWF, ARPEGE at METEO-FRANCE, and GFS at NCEP are based  
99 on the spherical harmonics transform method that includes Fourier transforms in the zonal di-  
100 rection and Legendre transforms in the meridional direction (Ehrendorfer, 2012). Moreover,  
101 some regional spectral models such as AROME at METEO-FRANCE (Seity et al., 2011) and  
102 RSM at NCEP (Juang et al., 1997) use the Bi-Fourier transform method. The Fourier trans-  
103 forms can be computed eﬃciently by fast Fourier transform (FFT) (Temperton, 1983). Even  
104 with the introduction of fast Legendre transform (FLT) to reduce the growing computational  
105 cost of increasing resolution of global spectral models (Wedi et al., 2013), it is believed that  
106 global spectral method is prohibitively expensive for very high resolution (Wedi, 2014).

107 A global (regional) spectral model performs FFT and FLT (FFT) in the zonal direction and  
108 the meridional direction, respectively. Because both transforms require all values in the corre-  
109 sponding directions, the parallelization of spectral method in global (regional) model is usually  
110 conducted to exploit the horizontal domain decomposition only in the zonal direction and merid-  
111 ional directions for FFT and FLT (FFT), respectively (Barros et al., 1995; Kanamitsu et al.,  
112 2005). Owing to the horizontal domain decomposition in a single horizontal direction for the

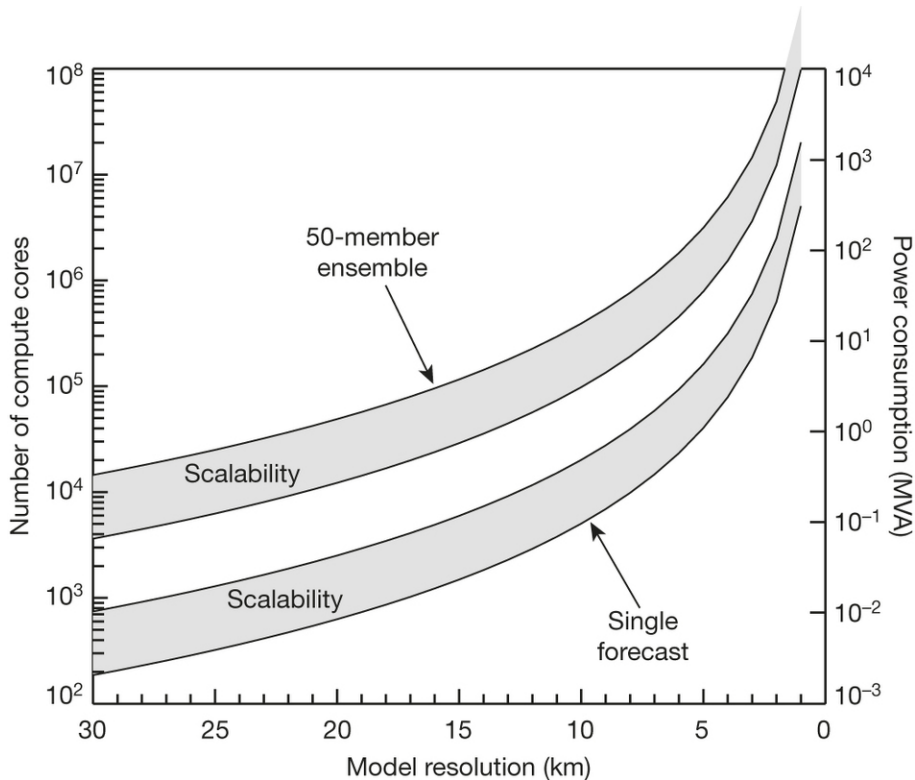

Fig. 1: CPU and power requirements as a function of NWP model resolution, adapted from Bauer et al. (2015). The left and right y axes are the number of cores and the power (in megavolt amps), respectively, required for a single 10-day model forecast (the lower shaded area including its bounds) and a 50-member ensemble forecast (the upper shaded area including its bounds) as a function of model resolution, respectively, based on current model code and compute technology. The lower and upper bounds of each shaded area indicate perfect scaling and inefficient scaling, respectively.

113 parallelization of spectral transforms, there is a transposition between the spectral transforms  
 114 in the zonal direction and meridional directions. MPI (Message Passing Interface) transposition  
 115 is an all-to-all personalized communication which can cause significant congestion over inter-  
 116 connect network when the number of MPI tasks and the amount of exchanged data are large,  
 117 and results in severe communication delay. Bauer et al. (2015) estimated that a global NWP  
 118 model with a two-kilometre horizontal resolution requires one million compute cores for a single  
 119 10-day forecast (Fig. 1). With one million compute cores, the performance and scalability of  
 120 the MPI transposition become of paramount importance for a high resolution global spectral  
 121 model. Thus, evaluating and predicting the performance and scalability of MPI transposition  
 122 at exascale is one of the foremost subjects of this study.

123 The Semi-Lagrangian (SL) method is a highly efficient technique for the transport of mo-  
 124 mentum, heat and mass in the NWP model because of its unconditional stability which permits  
 125 a long time step (Staniforth and Côté, 1991; Hortal, 2002). However, it is known that the MPI

126 exchange of wide halo required for the interpolation at the departure point of high wind-speed  
127 particles near the boundary of the subdomain causes significant communication overhead as  
128 resolution increases towards kilometres scale and the HPC systems move towards exascale.  
129 This communication overhead could reduce the efficiency of the SL method; thus, modelling  
130 the performance and scalability of wide halo exchange at exascale is essential and is another  
131 subject of this study.

132 With consideration of the efficiency of the Legendre transform and the scalability of MPI  
133 transposition that may arise in the global spectral model on exascale HPC systems, a cou-  
134 ple of global grid-point models have recently been developed (Lin, 2004; Satoh et al., 2008;  
135 Qaddouri and Lee, 2011; Skamarock et al., 2012; Dubos et al., 2015; Zangl et al., 2015; Kuhnlein and Smol  
136 2017). Since spherical harmonics are eigenfunctions of the Helmholtz operator, the Semi-  
137 Implicit (SI) method is usually adopted in order to implicitly handle the fast waves in the  
138 global spectral model to allow stable integration with a large time step (Robert et al., 1972;  
139 Hoskins and Simmons, 1975). However, for a grid-point model, the three-dimensional Helmholtz  
140 equation is usually solved using Krylov subspace methods such as the generalized conjugate  
141 residual (GCR) method (Eisenstat et al., 1983), and a global synchronization for the inner  
142 product in Krylov subspace methods may become the bottleneck at exascale (Li et al., 2013;  
143 Sanan et al., 2016). As it is not clear whether the three-dimensional Helmholtz equation can  
144 be solved efficiently in a scalable manner, most of the aforementioned models use a horizontally  
145 explicit vertically implicit (HEVI) scheme. The HEVI scheme typically requires some damping  
146 for numerical stability (Satoh et al., 2008; Skamarock et al., 2012; Zangl et al., 2015), and its  
147 time step is smaller than that of the SI method (Sandbach et al., 2015). Therefore, it is de-  
148 sirable to know whether the SI method is viable or even advantageous for very high resolution  
149 grid-point models running on exascale HPC systems. Thus, it is valuable to explore the per-  
150 formance and scalability of global synchronization in solving the three-dimensional Helmholtz  
151 equation using Krylov subspace methods; this forms the third subject of this study.

152 In this paper, we present the application of SST/macro 7.1, a coarse-grained parallel discrete  
153 event simulator, to investigate the communication performance and scalability of atmospheric  
154 models for future exascale supercomputers. The remainder of the paper is organized as fol-  
155 lows. Section 2 introduces the simulation environment, the SST/macro simulator, and our  
156 optimizations for reducing the memory footprint and accelerating the simulations. Section 3  
157 reviews three key MPI operations used in the atmospheric models. Section 4 presents and

158 analyses the experimental results of the modelling communication of the atmospheric model  
159 using SST/macro. Finally, we summarize the conclusions and discuss future work in section 5.

## 160 **2 Simulation Environment**

### 161 *2.1 Parallel Discrete Event Simulation*

162 Modelling application performance on exascale HPC systems with millions of nodes and a  
163 complex interconnect network requires that the simulation can be decomposed into small tasks  
164 that efficiently run in parallel to overcome the problem of large memory footprint and long  
165 simulation time. PDES is such an approach for exascale simulation. Each worker in PDES is  
166 a logical process (LP) that models a specific component such as a node, a switch, or an MPI  
167 process of the simulated MPI application. These LPs are mapped to the physical processing  
168 elements (PEs) that actually run the simulator. An event is an action such as sending an MPI  
169 message or executing a computation between consecutive communications. Each event has its  
170 start and stop times, so the events must be processed without violating their time ordering.  
171 To model the performance of an application, PDES captures time duration and advances the  
172 virtual time of the application by sending timestamped events between LPs.

173 PDES usually adopts conservative or optimistic parallelized strategies. The conservative  
174 approach maintains the time ordering of events by synchronization to guarantee that no early  
175 events arrive after the current event. Frequent synchronization is time-consuming so the effi-  
176 ciency of the conservative approach is highly dependent on the look ahead time; a larger look  
177 ahead time (that means less synchronization) allows a much greater parallelism. The optimistic  
178 approach allows LPs to run events at the risk of time-ordering violations. Events must be rolled  
179 back when time-ordering violations occurs. Rollback not only induces significant overhead, but  
180 also requires extra storage for the event list. Rollback presents special challenges for online  
181 simulation, so SST/macro adopts a conservative approach (Wike and Kenny, 2014).

### 182 *2.2 SST/macro Simulator*

183 Considering that the offline trace-driven simulation does not provide an easy way for extrap-  
184 olating to future architectures, the online simulator SST/macro is selected here to model the  
185 communications of the atmospheric models for future exascale HPC systems. SST/macro is a

186 coarse-grained parallel discrete event simulator which provides the best cost/accuracy trade-off  
 187 simulation for large-scale distributed applications (Janssen et al., 2010). SST/macro is driven  
 188 by either a trace file or a skeleton application. A skeleton application can be constructed from  
 189 scratch, or from an existing application manually or automatically by source-to-source trans-  
 190 lation tools. SST/macro intercepts the communications issued from the skeleton program to  
 191 estimate their time rather than actually execute it by linking the skeleton application to the  
 192 SST/macro library instead of the real MPI library. Since the purpose of this study is to investi-  
 193 gate the performance and scalability of communications in an atmospheric model, we construct  
 194 the communication-only skeleton program from scratch by identifying the key MPI operations  
 195 taking place in the atmospheric models.

196 Congestion is a significant factor that affects the performance and scalability of MPI appli-  
 197 cations running on exascale HPC systems. SST/macro has three network models: the analytical  
 198 model transfers the whole message over the network from point-to-point without packetizing  
 199 and estimates the time delay  $\Delta t$  predominantly based on the logP approximation

$$200 \quad \Delta t = \alpha + \beta N, \quad (1)$$

201 where  $\alpha$  is the communication latency,  $\beta$  is the inverse bandwidth in second per byte, and  $N$  is  
 202 the message size in bytes; the packet-level model PISCES (Packet-flow Interconnect Simulation  
 203 for Congestion at Extreme Scale) divides the message into packets and transfers the packets  
 204 individually; the flow-level model will be deprecated in the future. Compared to the SimGrid  
 205 simulator, the packet-level model of SST/macro produces almost identical results (figure omit-  
 206 ted). Acun et al. (2015) also found that the SST/macro online simulation is very similar to  
 207 the TraceR simulation. Thus, we adopt the PISCES model with a cut-through mechanism  
 208 (SNL, 2017) to better account for the congestion. SST/macro provides three abstract machine  
 209 models for nodes: the AMM1 model is the simplest one which grants exclusive access to the  
 210 memory, the AMM2 model allows multiple CPUs or NICs (network interface controller) to  
 211 share the memory bandwidth by defining the maximum memory bandwidth allocated for each  
 212 component, the AMM3 model goes one further step to distinguish between the network link  
 213 bandwidth and the switch bandwidth. In this paper, the AMM1 model with one single-core  
 214 CPU per node is adopted since simulation of communications is the primary goal.

215 SST/macro provides several topologies of the interconnect network. In this study, three



216 types of topologies (Fig. 2) commonly used in current supercomputers, and their configurations  
 217 are investigated. Torus topology has been used in many supercomputers (Ajima et al., 2009).  
 218 In the torus network, messages hop along each dimension using the shortest path routing  
 219 from the source to the destination (Fig. 2a), and its bisection bandwidth typically increases with  
 220 increasing dimension size of the torus topology. The practical implementation of the fattree  
 221 topology is an upside-down tree that typically employs all uniform commodity switches to  
 222 provide high bandwidth at higher levels by grouping corresponding switches of the same colour  
 223 (Fig. 2b). Fattree topology is widely adopted by many supercomputers for its scalability and  
 224 high path diversity (Leiserson, 1985); it usually uses a D-mod-k routing algorithm (Zahavi et al.,  
 225 2010) for desirable performance. A dragonfly network is a multi-level dense structure of which  
 226 the high-radix routers are connected in a dense even all-to-all manner at each level (Kim et al.,  
 227 2008). As shown in Fig. 2c, a typical dragonfly network consists of two levels: the routers at  
 228 the first level are divided into groups and routers in each group form a two-dimension mesh  
 229 of which each dimension is an all-to-all connected network; at the second level, the groups as  
 230 virtual routers are connected in an all-to-all manner (Alverson et al., 2015). There are three  
 231 available routing algorithms for dragonfly topology in SST/macro:

232 **minimal** transfers messages by the shortest path from the source to the destination. For  
 233 example, messages travel from the blue router in group 0 to the red router in group 2 via  
 234 the bottom-right corner in group 0 and the bottom-left corner in group 2 (Fig. 2c).

235 **valiant** randomly picks an intermediate router, and then uses a minimal routing algorithm to  
 236 transfer messages from the source to the intermediate router and from the intermediate  
 237 router to the destination. For example, the arrow path from the blue router in group 0  
 238 to the red router in group 2 goes via the intermediate yellow node in group 1 in Fig. 2c.

239 **ugal** checks the congestion, and either switches to the valiant routing algorithm if congestion  
 240 is too heavy, or otherwise uses the minimal routing algorithm.

241 Table 1 summaries the network topology configurations used in this paper. Torus-M (torus-  
 242 L) configuration is a 3D torus of 25x25x25 (75x25x25) size. Fattree-M (fattree-L) configuration  
 243 has 4 layers: the last layer consists of nodes while the other layers consist of switches with 25 (33)  
 244 descendant ports per switch. We tested four configurations of dragonfly topology. Dragonfly-  
 245 MM configuration has a medium size of a group of a 25x25 mesh with 25 nodes per switch

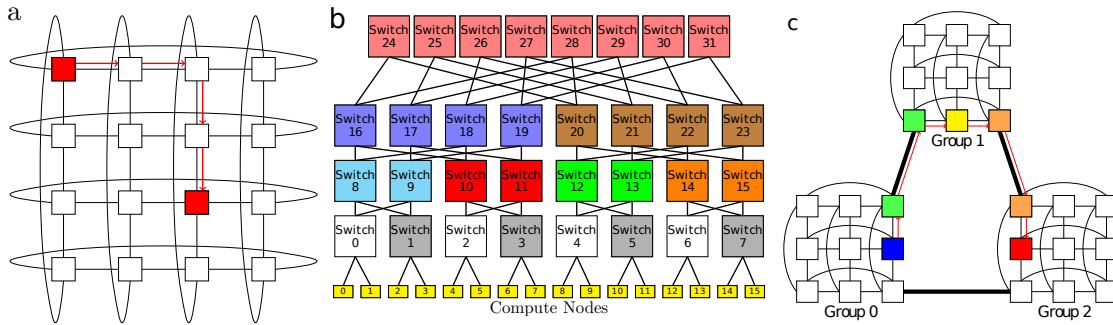

Fig. 2: Topology illustration: a, b, and c are the torus, fattree, and dragonfly topologies, respectively. Adapted from SNL (2017)

Table 1: Summary of the network topologies: the geometry of a torus topology specifies the size of each dimension; the first and second number in the geometry of a fattree topology are the number of layers and descendant ports per switch, respectively; the first two numbers and the last number in the geometry of a dragonfly topology indicate the group mesh size and the number of groups, respectively.

| name         | geometry  | switches | nodes per switch | nodes   | radix |
|--------------|-----------|----------|------------------|---------|-------|
| torus-M      | 25,25,25  | 15625    | 25               | 390625  | 31    |
| fattree-M    | 4,25      | 46875    | 25               | 390625  | 50    |
| dragonfly-MM | 25,25,25  | 15625    | 25               | 390625  | 97    |
| dragonfly-SL | 25,25,125 | 15625    | 5                | 390625  | 177   |
| dragonfly-LS | 125,125,5 | 15625    | 5                | 390625  | 257   |
| torus-L      | 75,25,25  | 46875    | 25               | 1171875 | 31    |
| fattree-L    | 4,33      | 107811   | 33               | 1185921 | 66    |
| dragonfly-ML | 25,25,75  | 46875    | 25               | 1171875 | 147   |

246 and medium number (=25) of groups. Dragonfly-SL configuration has a small size of a group  
247 of a 25x25 mesh with 5 nodes per switch and large number (=125) of groups. Dragonfly-LS  
248 configuration has a large size of a group of a 125x125 mesh with 5 nodes per switch and small  
249 number (=5) of groups. Dragonfly-ML configuration has a medium size of a group of a 25x25  
250 mesh with 25 nodes per switch and large number (=75) of groups. The fattree configuration  
251 has a significant larger number of switches than other topologies for the same number of nodes,  
252 which indicates that fattree is not cost- or energy-efficient. All the configurations with 390625  
253 nodes are used for simulating transposition for the spectral transform method. Torus-L, fattree-  
254 L, and dragonfly-ML with more than one million nodes are used for the cases of halo exchange  
255 and allreduce communication since we cannot finish the simulation of transposition for the  
256 spectral transform method (multiple simultaneous all-to-all personalized communications) on  
257 such large configuration within 24 hours (see Section 3 for three key MPI communications in  
258 the atmospheric model).

### 259 *2.3 Reduce the Memory Footprint and Accelerate the Simulation*

260 Although SST/macro is a parallel discrete event simulator that can reduce the memory foot-  
261 print per node, its parallel efficiency degrades if more cores are used. Even with an MPI  
262 transposition of  $10^5$  processes, this all-to-all personalized communication has almost  $10^{10}$  dis-  
263 crete events, which consumes a considerable amount of memory and takes a very long time  
264 for simulation. Furthermore, almost every MPI program has a setup step to allocate memory  
265 for storing the setup information such as the parameters and the domain decomposition of all  
266 processes what each process must know in order to properly communicate with other processes,  
267 therefore, it needs to broadcast the parameters to and synchronize with all processes before  
268 actual communications and computation. Even if the setup information for a single process  
269 needs only  $10^2$  bytes memory, a simulation of  $10^5$  processes MPI transposition will need one  
270 terabyte ( $10^2 \times 10^5 \times 10^5 = 10^{12}$  bytes) memory, which is not easily available on current com-  
271 puters if the simulator runs on a single node. In addition, the MPI operations in the setup step  
272 not only are time-consuming, but also affect subsequent communications. A common way to  
273 eliminate this effect is to iterate many times to obtain a robust estimation of communication  
274 time; however, one iteration is already very time-consuming for simulation. To circumvent the  
275 issue of setup steps, we use an external auxiliary program to create a shared memory segment  
276 on each node running SST/macro and initialize this memory with the setup information of all  
277 the simulated MPI processes. Then, we modified SST/macro to create a global variable and  
278 attach the shared memory to this global variable; this method not only reduces the memory  
279 footprint and eliminates the side effect of communications in the setup step, but also avoids  
280 the problem of filling up the memory address space if each simulated process attaches to the  
281 shared memory.

282 Large-scale application needs a large amount of memory for computation; and in some  
283 cases, such as spectral model, the whole memory for computation is exchanged between all the  
284 processes. Even when computation is not considered, a large amount of memory for the message  
285 buffers is usually required for MPI communications. Fortunately, the simulator only needs  
286 message size, the source/destination, and the message tag to model the communication; thus,  
287 it is not necessary to allocate actual memory. Since SST/macro can operate with null buffers,  
288 the message buffer is set to null in the skeleton application, which significantly reduces the size  
289 of memory required by the simulation of communication of the high resolution atmospheric

290 model.

### 291 **3 Key MPI Operations in Atmospheric Models**

#### 292 **3.1 Transposition for the Spectral Transform Method**

293 A global spectral model generally uses spherical harmonics transform on the horizontal with  
294 triangular truncation. The backward spherical harmonics transform is

$$295 \quad f(\theta, \lambda) = \sum_{m=-M}^M \left( e^{im\lambda} \sum_{n=|m|}^M f_n^m P_n^m(\cos \theta) \right), \quad (2)$$

296 where  $\theta$  and  $\lambda$  are the colatitude and longitude,  $f_n^m$  is the spectral coefficients of the field  $f$ , and  
297  $P_n^m$  is the associated Legendre polynomials of degree  $m$  and order  $n$ . Moreover, the forward  
298 spherical harmonics transform is

$$299 \quad f_n^m = \frac{1}{2} \int_{-1}^1 \left( P_n^m(\cos \theta) \frac{1}{2\pi} \int_0^{2\pi} f(\theta, \lambda) e^{-im\lambda} d\lambda \right) d \cos \theta, \quad (3)$$

300 In (2), the backward Legendre transform of each  $m$  can be computed independently; then,  
301 the same is for the backward Fourier transform of each  $\theta$ . Similar to (3), the forward Fourier  
302 transform of each  $\theta$  can be computed independently; then, the same is for the forward Legendre  
303 transform of each  $m$ . This leads to a natural way to parallelize the spectral transforms. If  
304 we start with the grid-point space (Fig. 3a), which is decomposed by  $cx/cy$  cores in the x/y  
305 direction,  $cy$  simultaneous xz slab MPI transpositions lead to the partition (Fig. 3b) with  $cy/cx$   
306 cores in the y/z direction, and a spectral transform such as a forward FFT can be performed  
307 in parallel since data w.r.t.  $\lambda$  are local to each core. Then,  $cx$  simultaneous xy slab MPI  
308 transpositions lead to the partition (Fig. 3c) with  $cy/cx$  cores in the x/z direction, and a  
309 spectral transform such as a forward FLT can be computed in parallel because data w.r.t.  $\theta$   
310 are now local to each core. Finally,  $cy$  simultaneous yz slab MPI transpositions lead to the  
311 spectral space (Fig. 3d) with  $cy/cx$  cores in the x/y direction, where the Semi-Implicit scheme  
312 can be easily computed because spectral coefficients belonging to the same column are now  
313 local to the same core. The backward transform is similar. It is of paramount importance that  
314 the partition of the four stages described in Fig. 3 must be consistent so that multiple slab MPI  
315 transpositions can be conducted simultaneously, which significantly reduces the communication

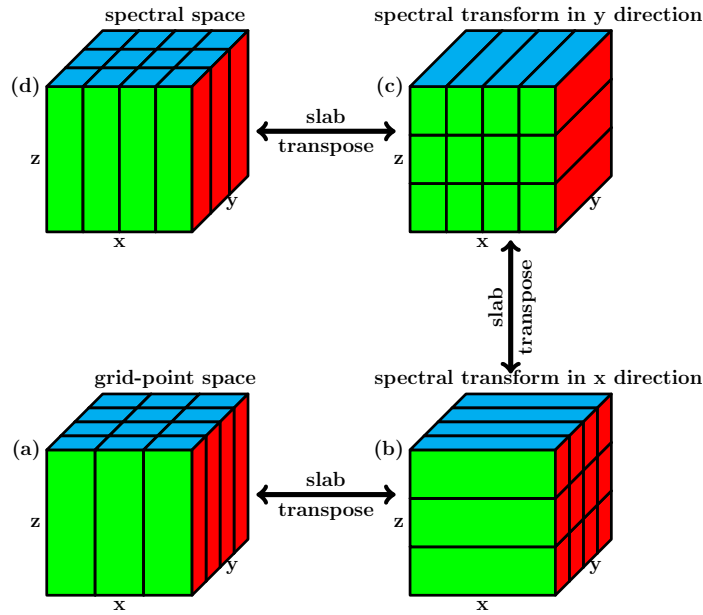

Fig. 3: Parallel scheme of regional spectral model: (a) 2D decomposition of 3D grid field with  $cx/cy$  cores in the x/y direction, (b) 2D decomposition of 3D grid field with  $cy/cx$  cores in the y/z direction, (c) 2D decomposition of 3D grid field with  $cy/cx$  cores in the x/z direction, and (d) 2D decomposition of 3D grid field with  $cy/cx$  cores in the x/y direction. Transposition between (a) and (b) can be conducted by  $cy$  independent  $xz$  slab MPI transpositions, transposition between (b) and (c) can be conducted by  $cx$  independent  $xy$  slab MPI transpositions, and transposition between (c) and (d) can be conducted by  $cy$  independent  $yz$  slab MPI transpositions.

316 time of MPI transpositions from one stage to another. It is worth noting that the number of  
 317 grid points in one direction is not always a multiple of the number of cores in the corresponding  
 318 direction; thus, the partition shown in Fig. 3 can use as many as possible computed cores  
 319 without any limit on  $cx$  or  $cy$  provided  $cx \times cy = ncpu$ , and  $cx$  or  $cy$  is not greater than the  
 320 number of grid points in the corresponding direction. It is generally believed that the MPI  
 321 transpositions from one stage to another poses a great challenge to the scalability of spectral  
 322 models because each slab MPI transposition is an all-to-all personalized communications which  
 323 is the most complex and time-consuming all-to-all communication.

324 There are different algorithms for all-to-all personalized communication. Table 2 lists the  
 325 three algorithms for all-to-all personalized communication, whose performance and scalability  
 326 are investigated in this study. Algorithm ring-k is our proposal algorithm for all-to-all per-  
 327 sonalized communication which is a generalized ring alltoally algorithm. In algorithm ring-k,  
 328 each process communicates with  $2k$  processes to reduce the stages of communications and make  
 329 efficient use of the available bandwidth, and thus reduces the total communication time.

Table 2: Three algorithms for all-to-all personalized communication.

| name          | description                                                                                                                                                                                                                                                                                                                                                                                                                                                                                                     | stages                        |
|---------------|-----------------------------------------------------------------------------------------------------------------------------------------------------------------------------------------------------------------------------------------------------------------------------------------------------------------------------------------------------------------------------------------------------------------------------------------------------------------------------------------------------------------|-------------------------------|
| <b>burst</b>  | Each process communicates with all other processes simultaneously by posting all non-block send and receive operations simultaneously. The burst messages cause significant congestion on the network. This algorithm is equivalent to the algorithm ring-k when k=n-1.                                                                                                                                                                                                                                         | 1                             |
| <b>bruck</b>  | This algorithm is better for small message and a large latency since it has only $\lceil \log_2(n) \rceil$ stages of communications (Thakur et al., 2005). For $k^{th}$ stage, each process sends the messages whose destination process id has one at the $k^{th}$ bit (begin at Least Significant Bit) to process $i + 2^k$ .                                                                                                                                                                                 | $\lceil \log_2(n) \rceil$     |
| <b>ring-k</b> | In the first stage, process $i$ sends to $i + 1, \dots, i + k$ and receive from $i - 1, \dots, i - k$ in a ring way (black arrows in Fig. 4a); in the second stage, process $i$ sends to $i + 1 + k, \dots, i + 2k$ and receive from $i - 1 - k, \dots, i - 2k$ in a ring way (blue arrows in Fig. 4a); this continues until all partners have been communicated with. This algorithm is a generalization of the ring algorithm and efficiently uses the available bandwidth by proper selection of radix $k$ . | $\lceil \frac{n-1}{k} \rceil$ |

### 3.2 Halo Exchange for Semi-Lagrangian Method

The SL method solves the transport equation:

$$\frac{D\phi}{Dt} = \frac{\partial\phi}{\partial t} + u\frac{\partial\phi}{\partial x} + v\frac{\partial\phi}{\partial y} + w\frac{\partial\phi}{\partial z} = 0, \quad (4)$$

where the scalar field  $\phi$  is advected by the 3D wind  $\mathbf{V} = (u, v, w)$ . In the SL method, the grid-point value of the scalar field  $\phi$  at next time step  $t + \Delta t$  can be found by integrating (4) along the trajectory of the fluid parcel (Staniforth and Côté, 1991; Hortal, 2002)

$$\int_t^{t+\Delta t} \frac{D\phi}{Dt} dt = 0 \rightarrow \phi^{t+\Delta t} = \phi_d^t, \quad (5)$$

where  $\phi^{t+\Delta t}$  is the value of the fluid parcel  $\phi$  arriving at any grid point at  $t + \Delta t$ , and  $\phi_d^t$  is the value of the same fluid parcel at its departure point  $d$  and departure time  $t$ . This means that the value of the scalar field  $\phi$  at any grid point at  $t + \Delta t$  is equal to its value at the departure point  $d$  and the departure time  $t$ . The departure point  $d$  usually does not coincide with any grid point, so the value of  $\phi_d^t$  is obtained by interpolation using the surrounding grid-point values  $\phi^t$  at time  $t$ . The departure point  $d$  is determined by iteratively solving the trajectory equation

343 (Staniforth and Côté, 1991; Hortal, 2002)

$$344 \quad \frac{D\mathbf{r}}{Dt} = \mathbf{V}(\mathbf{r}, t) \rightarrow \mathbf{r}^{t+\Delta} - \mathbf{r}_d^t = \int_t^{t+\Delta} \mathbf{V}(\mathbf{r}, t) dt, \quad (6)$$

345 where  $\mathbf{r}^{t+\Delta}$  and  $\mathbf{r}_d^t$  are the position of the arrival and the departure point, respectively. From  
346 (6), it is obvious that the departure point is far from its arrival point if the wind speed is large.  
347 Thus, the departure point of one fluid parcel at the boundary of the subdomain of an MPI task  
348 is far from its boundary if the wind speed is large and the wind blows from the outside. To  
349 facilitate calculation of the departure point and its interpolation, MPI parallelization adopts  
350 a “maximum wind” halo approach so that the halo is sufficiently large for each MPI task to  
351 perform its SL calculations in parallel after exchanging the halo. This “maximum wind” halo  
352 is named “wide halo” since its width is significantly larger than that of the thin halo of finite  
353 difference methods whose stencils have compact support. With numerous MPI tasks, the width  
354 of a wide halo may be larger than the subdomain size of its direct neighbour, which implies  
355 that the process needs to exchange the halo with its neighbours and its neighbours’ neighbours,  
356 which may result in a significant communication overhead which counteracts the efficiency of  
357 the favourite SL method, and pose a great challenge to the scalability of the SL method.

358 Fig. 4b demonstrates the halo exchange algorithm adopted in this paper. First, the al-  
359 gorithm posts the MPI non-block send and receive operations 1-4 simultaneously for the x-  
360 direction sweep. After the x-direction sweep, a y-direction sweep is performed in a similar way  
361 but the length of halo is extended to include the left and right haloes in the x-direction so that  
362 the four corners are exchanged properly. This algorithm needs two stages communications,  
363 but is simple to implement, especially for the wide halo exchange owing to its fixed regular  
364 communication pattern (Fig. 9d). In Fig. 9d, the pixels (near purple colour) tightly attached  
365 to the diagonal are due to the exchange in x-direction, the pixels of the same colour but off  
366 diagonal are due because of the periodicity in x-direction; the pixels (near orange or red colour)  
367 off diagonal are due to the exchange in y-direction, and the pixels of the same colour but far  
368 off diagonal are because of the periodicity in y-direction. This algorithm also applies to the  
369 thin halo exchange for finite difference methods which is extensively used in the grid-point  
370 models. The study emphasizes on the wide halo exchange, but the thin halo exchange is also  
371 investigated for comparison (see the red line in Fig. 9a).

### 3.3 Allreduce in Krylov Subspace Methods for the Semi-Implicit Method

The three-dimensional SI method leads to a large linear system which can be solved by Krylov subspace methods:

$$\mathbf{Ax} = \mathbf{b}, \quad (7)$$

where  $\mathbf{A}$  is a non-symmetric sparse matrix. Krylov subspace methods find the approximation  $\mathbf{x}$  iteratively in a  $k$ -dimensional Krylov subspace:

$$\mathcal{K} = \text{span}(\mathbf{r}, \mathbf{Ar}, \mathbf{A}^2\mathbf{r}, \dots, \mathbf{A}^{k-1}\mathbf{r}), \quad (8)$$

where  $\mathbf{r} = \mathbf{b} - \mathbf{Ax}$ . To accelerate the convergence, preconditioning is generally used:

$$\mathbf{M}^{-1}\mathbf{Ax} = \mathbf{M}^{-1}\mathbf{b} \quad (9)$$

where  $\mathbf{M}$  approximates  $\mathbf{A}$  well so that  $\mathbf{M}^{-1}\mathbf{A}$  be conditioned better than  $\mathbf{A}$  and  $\mathbf{M}^{-1}$  can be computed cheaply. The GCR method is a Krylov subspace method of easy implementation and can be used with variable preconditioners. Algorithm 1 of GCR shows that there are two allreduces operations using the sum operation for the inner product in each iteration, thus, it has  $2N$  allreduce operations if the GCR iterative solver reaches convergence in  $N$  iterations. Allreduce is an all-to-all communication and becomes expensive when the number of iterations becomes larger in GCR solver with numerous MPI processes.

Fig. 4c demonstrates the recursive-k algorithm for the allreduce operation, which is a generalization of the recursive doubling algorithm. Let  $p = \lfloor \log_k(ncpu) \rfloor$ , this algorithm has  $2 + p$  stages of communications if the number of processes is not a power of radix  $k$ . In the first stage with stage id  $j = 0$  (the first row in Fig. 4c), each remaining process whose id  $i \notin [0, k^p - 1]$  sends its data to process  $i - (ncpu - k^p)$  for the reduce operation. For the stage of stage id  $j \in [1, p]$  (rows between the first row and second last row in Fig. 4c), each process whose id  $i \in [0, k^p - 1]$  only reduces with the processes that are a distance of  $k^{j-1}$  apart from itself. In the final stage with stage id  $j = 1 + p$  (the second last row in Fig. 4c), each process whose id  $i \notin [0, k^p - 1]$  receives its final result from process  $i - (ncpu - k^p)$ . The recursive-k algorithm uses large radix  $k$  to reduce the stages of communications and the overall communication time.



---

**Algorithm 1** Preconditioned GCR returns the solution  $\mathbf{x}_i$  when convergence occurs where  $\mathbf{x}_0$  is the first guess solution and  $k$  is the number of iterations for restart.

---

```

1: procedure GCR( $\mathbf{A}, \mathbf{M}, \mathbf{b}, \mathbf{x}_0, k$ )
2:    $\mathbf{r}_0 \leftarrow \mathbf{b} - \mathbf{A}\mathbf{x}_0$ 
3:    $\mathbf{u}_0 \leftarrow \mathbf{M}^{-1}\mathbf{r}_0$ 
4:    $\mathbf{p}_0 \leftarrow \mathbf{u}_0$ 
5:    $\mathbf{s}_0 \leftarrow \mathbf{A}\mathbf{p}_0$ 
6:    $\gamma_0 \leftarrow \langle \mathbf{u}_0, \mathbf{s}_0 \rangle, \eta_0 \leftarrow \langle \mathbf{s}_0, \mathbf{s}_0 \rangle$  ▷ Allreduce(sum) of two doubles
7:    $\alpha_0 \leftarrow \frac{\gamma_0}{\eta_0}$ 
8:   for  $i = 1, \dots$ , until convergence do
9:      $\mathbf{x}_i \leftarrow \mathbf{x}_{i-1} + \alpha_{i-1}\mathbf{p}_{i-1}$ 
10:     $\mathbf{r}_i \leftarrow \mathbf{r}_{i-1} - \alpha_{i-1}\mathbf{s}_{i-1}$ 
11:     $\mathbf{u}_i \leftarrow \mathbf{M}^{-1}\mathbf{r}_i$ 
12:    for  $j = \max(0, i - k), \dots, i - 1$  do
13:       $\beta_{i,j} \leftarrow \frac{-1}{\eta_j} \langle \mathbf{A}\mathbf{u}_i, \mathbf{s}_j \rangle$  ▷ Allreduce(sum) of min(i,k) doubles
14:       $\mathbf{p}_i \leftarrow \mathbf{u}_i + \sum_{j=\max(0, i-k)}^{i-1} \beta_{i,j}\mathbf{p}_j$ 
15:       $\mathbf{s}_i = \mathbf{A}\mathbf{p}_i$ 
16:       $\gamma_i \leftarrow \langle \mathbf{u}_i, \mathbf{s}_i \rangle, \eta_i \leftarrow \langle \mathbf{s}_i, \mathbf{s}_i \rangle$  ▷ Allreduce(sum) of two doubles
17:       $\alpha_i \leftarrow \frac{\gamma_i}{\eta_i}$ 
18:   return  $\mathbf{x}_i$ 

```

---

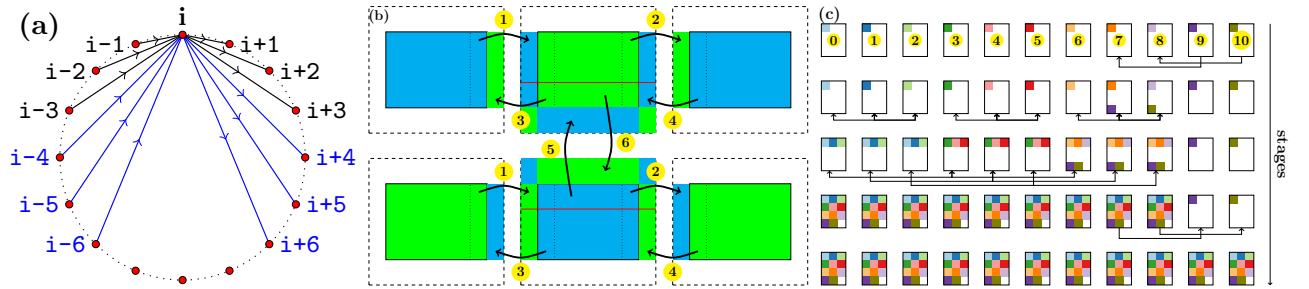

Fig. 4: Algorithms for three key MPI operations: (a) is the ring-k algorithm with  $k$  radix for all-to-all personalized communication generalized from ring alltoallv algorithm, (b) is the halo exchange algorithm, and (c) is the recursive-k algorithm with  $k$  radix generalized from the recursive doubling algorithm.

Table 3: A three-dimensional grid for assessing the communication of the atmospheric model.  $\Delta x$  and  $\Delta y$  are given as if this grid is a uniform global longitude-latitude grid. In fact, this grid resembles the grid of a regional spectral atmospheric model or the uniform longitude-latitude grid used by some global models.

| <b>nx</b>                 | <b>ny</b> | <b>nz</b> | <b><math>\Delta x</math></b> | <b><math>\Delta y</math></b> | <b>grid points</b> |
|---------------------------|-----------|-----------|------------------------------|------------------------------|--------------------|
| 28800                     | 14400     | 256       | 0.0125°                      | 0.0125°                      | > 100 billion      |
| <b>memory size</b>        |           |           | <b>max processes</b>         |                              |                    |
| > 800 GB per double field |           |           | 3686400 for a 2D partition   |                              |                    |

## 4 Experimental Results

### 4.1 Experiment Design

In the next decade, it is estimated the resolution of global NWP model will approach kilometre-scale and the HPC will move towards exascale. What would the performance of a global NWP model with a very high resolution on exascale HPC be? In this paper, we are especially interested in the strong scaling of an atmospheric model, that is, how does the atmospheric model with fixed resolution (such as the one presented in Table 3) behave as the number of processes increases? In this study, these strong scalings of the three key MPI operations in the atmospheric model are assessed for  $10^2, 2 \times 10^2, \dots, 9 \times 10^2, 10^3, 2 \times 10^3, \dots, 9 \times 10^3, 10^4, 2 \times 10^4, \dots, 9 \times 10^4, 10^5, 2 \times 10^5, \dots, 9 \times 10^5, 10^6$  MPI tasks; but the maximum number of processes is  $2 \times 10^5$  for the MPI transposition owing to the hard time limitation in our cluster. Table 3 presents a summary of the three-dimensional grid for assessing the communication of the kilometre-scale atmospheric model. The number of grid points of this grid is beyond 100 billion, and one field of double precision variable for this grid requires more than 800 gigabytes of memory. Only with such a large grid, is it possible to perform a 2D domain decomposition for a spectral model with more than one million processes so that modelling the communication of the atmospheric model at exascale HPC become possible.

Besides the topology and its configuration, the routing algorithm, and the collective MPI algorithm; the bandwidth and the latency of the interconnect network of an HPC system have a great impact on the performance of communications. First, we simulate the transposition for the spectral transform method in the simulator for three topologies (torus-M, fattree-M, and dragonfly-MM in Table 1), three configurations of dragonfly topology (dragonfly-MM, dragonfly-SL, and dragonfly-LS in Table 1), three routing algorithms (minimal, valiant, and

421 ugal), and three alltoally algorithms (Table 2). In addition, we compare the simulations of the  
422 transposition for the spectral transform method between four interconnect bandwidths ( $10^0$ ,  
423  $10^1$ ,  $10^2$ , and  $10^3$  GB/s) and between four interconnect latencies ( $10^1$ ,  $10^2$ ,  $10^3$ , and  $10^4$  ns).  
424 After a thorough investigation of the transposition for the spectral transform method, we test  
425 the halo exchange for the SL method with different halo widths (3, 10, 20, and 30 grid points),  
426 three topologies (torus-L, fattree-L, dragonfly-ML in Table 1), and three routing algorithms  
427 (minimal, valiant, and ugal). Finally, the allreduce operation in Krylov subspace methods for  
428 the SI method is evaluated on different topologies (torus-L, fattree-M, dragonfly-ML in Table  
429 1), and the statistics of the optimal radix of recursive-k algorithms for allreduce operations are  
430 presented.

#### 431 **4.2 Transposition for the Spectral Transform Method**

432 Fig. 5a shows that the communication times for the burst, bruck, ring-1, and ring-4 algorithms  
433 decrease as the number of MPI processes increases. The ring-1 and ring-4 algorithms are  
434 almost identical for less than  $5 \times 10^4$  MPI processes, but ring-4 performs better than ring-1 for  
435 more than  $10^5$  MPI processes. The burst and bruck algorithms perform worse than the ring-k  
436 algorithm. The SST/macro simulator cannot simulate the burst algorithm for more than  $2 \times 10^4$   
437 MPI processes because the burst messages result in huge events and large memory footprint.  
438 The communication time of the bruck algorithm is significantly larger than that of the ring-k  
439 algorithm for less than  $10^5$  MPI processes; however, for a greater number of processes, it is  
440 better than the ring-1 algorithm since the bruck algorithm is targeted for small messages, and  
441 the more processes, the smaller message for a fixed sized problem. The performance of these  
442 alltoally algorithms is confirmed by actually running the skeleton program of transposition  
443 for the spectral transform method with  $10^4$  MPI processes on the research cluster of Météo  
444 France (Beaufix), which shows that the ring-4 algorithm is even better than the INTEL native  
445 MPI\_Alltoally function (Fig. 6).

446 The differences in the communication times of the transpositions between the topology  
447 torus-M, fattree-M, and dragonfly-MM can be an order of magnitude (Fig. 5b). Messages have  
448 to travel a long distance in the topology torus-M which is a 3D torus, so its communication  
449 time is the largest. The best performance of the topology fattree-M can be attributed to its  
450 non-blocking D-mod-k routing algorithm, but its communication time gradually increases as

451 the number of MPI processes increases beyond  $10^4$ . The performance of topology dragonfly-  
 452 MM is between that of torus-M and fattree-M (Fig. 5b), it can achieve a better performance by  
 453 tuning the configuration of the dragonfly topology (Fig. 5c). By comparing Fig. 5b and Fig. 5c,  
 454 we can see that the topologies of dragonfly-SL and dragonfly-LS are still not as good as the  
 455 fattree-M, but their performance is very close to that of fattree-M and they lose less scalability  
 456 than fattree-M for more than  $5 \times 10^4$  MPI processes.

457 The differences in communication time of the transpositions between the routing algorithms  
 458 of minimal, valiant and ugal are also an order of magnitude (Fig. 5d), which indicates that the  
 459 impact of routing algorithm on communication is significant. The valiant routing algorithm  
 460 performs the best, but the communication time begins to increase when the number of MPI  
 461 processes is larger than  $3 \times 10^4$ . The ugal routing algorithm performs the worst, and the  
 462 performance of minimal routing algorithm is in between that of valiant and ugal routing al-  
 463 gorithms. The valiant routing algorithm has the longest path for messages from the source to  
 464 the destination with a randomly chosen intermediate node; thus, theoretically, its communica-  
 465 tion time is larger. On the contrary, the minimal routing algorithm that moves the messages  
 466 using the shortest path from the source to the destination has the smallest communication  
 467 time. The congestion between processes in Fig. 7 shows that the valiant routing algorithm for  
 468 the dragonfly-MM topology (Fig. 7b) and the minimal routing algorithm for the dragonfly-SL  
 469 topology (Fig. 7d) are less congested and have a more uniform congestion, the minimal routing  
 470 algorithm for the dragonfly-MM topology is moderately congested, but its congestion is not  
 471 uniform (Fig. 7a), the congestion of the ugal routing algorithm for the dragonfly-MM topology  
 472 is large and highly non-uniform (Fig. 7c). These congestions in Fig. 7 are consistent with the  
 473 communication times in Fig. 5c and Fig. 5d, that is, the more uniform congestion, the lower  
 474 communication time because the latter is determined by the longest delay event and uniform  
 475 congestion can avoid the hotspot of the congestion with the longest delay event. Fig. 8 con-  
 476 firms this that a high percentage of delay events has a delay time of less than 30 us using the  
 477 valiant routing algorithm for the dragonfly-MM topology and the minimal routing algorithm  
 478 for the dragonfly-SL topology; however the minimal routing algorithm for the dragonfly-MM  
 479 topology has a significant percentage of events that delays by more than 50 us, especially there  
 480 are a large number of events delayed by more than 100 us using the ugal routing algorithm  
 481 for the dragonfly-MM topology. Thus, the configuration of the interconnect network and the  
 482 design of its routing algorithm should make the congestion as uniform as possible if congestion

483 is inevitable.

484 Although the communication time with a bandwidth of  $10^0$  GB/s is apparently separated  
485 from those with bandwidths of  $10^1$ ,  $10^2$ , and  $10^3$  GB/s, the curves describing the communication  
486 times with bandwidths of  $10^1$ ,  $10^2$ , and  $10^3$  GB/s overlap (Fig. 5e). The communication times  
487 with latencies of  $10^1$  and  $10^2$  ns are almost identical; that with a latency of  $10^3$  ( $10^4$ ) ns is  
488 slightly (apparently) different from those with latencies of  $10^1$  and  $10^2$  ns (Fig. 5f). Equation  
489 (1) indicates that the communication time stops decreasing only when  $\alpha$  ( $\beta$ ) approaches zero and  
490  $\beta$  ( $\alpha$ ) is constant. Neither  $\alpha$  in Fig. 5e nor  $\beta$  in Fig. 5f approaches zero, but the communication  
491 time stops decreasing. The inability of the analytical model (1) to explain this suggests that  
492 other dominant factors such as congestion contribute to the communication time. Latency  
493 is the amount of time required to travel the path from one location to another. Bandwidth  
494 determines how many data per second can be moved in parallel along that path, and limits the  
495 maximum number of packets travelling in parallel. Because both  $\alpha$  and  $\beta$  are greater than zero,  
496 congestion occurs when data arrives at a network interface at a rate faster than the media can  
497 service; when this occurs, packets must be placed in a queue to wait until earlier packets have  
498 been serviced. The longer the wait, the longer the delay and communication time. Fig. 8b and  
499 Fig. 8c show the distributions of the delay caused by congestion for different bandwidths and  
500 different latencies, respectively. In Fig. 8b, the distributions of the delay for bandwidths of  $10^1$ ,  
501  $10^2$ , and  $10^3$  GB/s are almost identical, which explains their overlapped communication times  
502 in Fig. 5e; and the distribution of the delay for a bandwidth of  $10^0$  GB/s is distinct from the  
503 rest since near 20 percent of events are delayed by less than 10 us but a significant percentage  
504 of events are delayed more than 100 us, which accounts for its largest communication time in  
505 Fig. 5e. In Fig. 8c, the distributions of the delay for latencies of  $10^1$  and  $10^2$  ns are the same;  
506 the distributions of the delay for a latency of  $10^3$  ns is slightly different from the formers; but  
507 the distributions of the delay for a latency of  $10^4$  ns has a large percentage of events in the  
508 right tail which resulted in the longest communication time; these are consistent with their  
509 communication times in Fig. 5f.

510 In summary, the alltoallv algorithm, the topology and its configuration, the routing al-  
511 gorithm, the bandwidth, and the latency have great impacts on the communication time of  
512 transpositions. In addition, the communication time of transpositions decreases as the number  
513 of MPI processes increases in most cases; however, this strong scalability is not applicable for  
514 the fattree-M topology (the red line in Fig. 5b), the dragonfly-SL and dragonfly-LS topologies

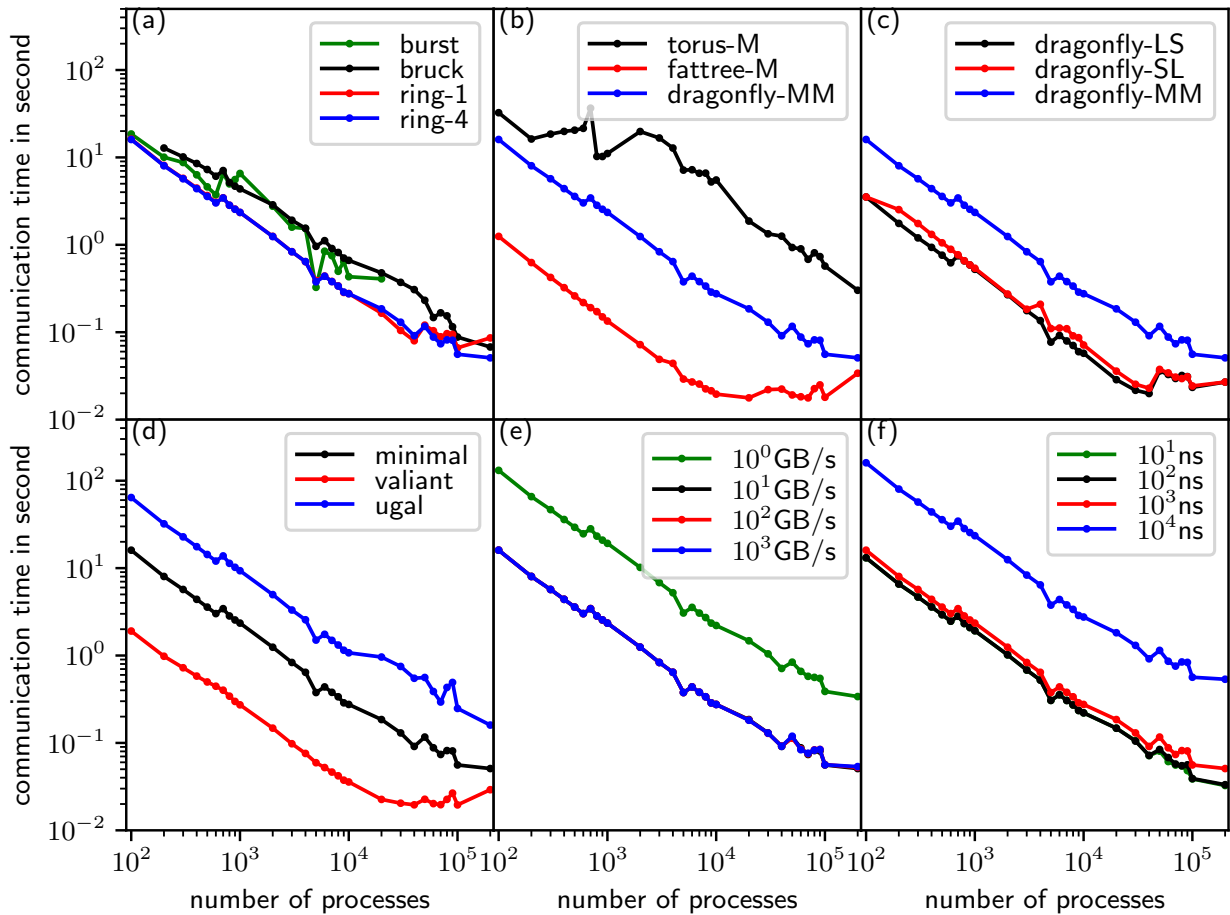

Fig. 5: Communication times of transposition for (a) alltoall algorithms, (b) topologies, (c) configurations of the dragonfly topology, (d) routing algorithms for the dragonfly topology, (e) bandwidth, and (f) latency. [The circle markers indicate the numbers of processes of the corresponding simulations.](#)

515 (red and black lines in Fig. 5c), and the valiant routing algorithm (the red line in Fig. 5d) when  
 516 the number of MPI processes is large. Thus, the topology of the interconnect network and its  
 517 routing algorithm have a great impact on the scalability of transpositions for the spectral trans-  
 518 form method. Since the transposition for spectral transform method is a multiple simultaneous  
 519 all-to-all personalized communication, congestion has a great impact on its performance.

### 520 4.3 Halo Exchange for the Semi-Lagrangian Method

521 The most common application of the wide halo exchange is the SL method. For the resolution  
 522 of  $0.0125^\circ$  in Table 3 and a time step of 30 seconds, the departure is approximately 5 grid  
 523 points away from its arrival if the maximum wind speed is 200 m/s; therefore, the width of the  
 524 halo is at least 7 grid points using the ECMWF quasi-cubic scheme (Ritchie, 1995); there are  
 525 more grid points if a higher order scheme such as the SLICE-3D (Zerroukat and Allen, 2012)

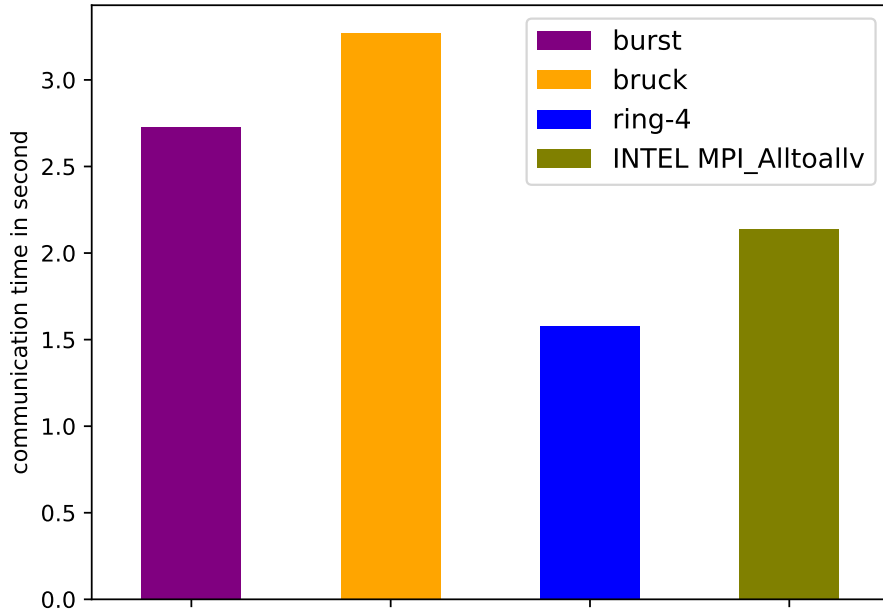

Fig. 6: Actual communication time of transposition for the spectral transform method with  $10^4$  MPI processes run on beaufix cluster in Météo France.

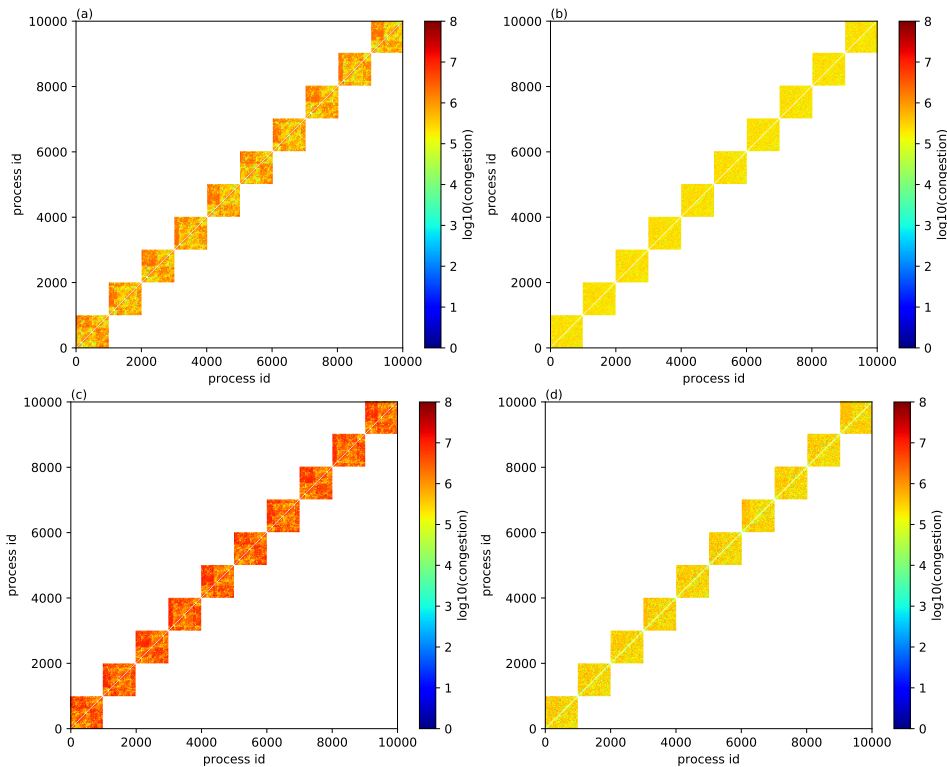

Fig. 7: Congestion of transposition using (a) minimal routing algorithm for the dragonfly-MM topology, (b) valiant routing algorithm for the dragonfly-MM topology, (c) ugal routing algorithm for the dragonfly-MM topology, and (d) minimal routing algorithm for the dragonfly-SL topology.

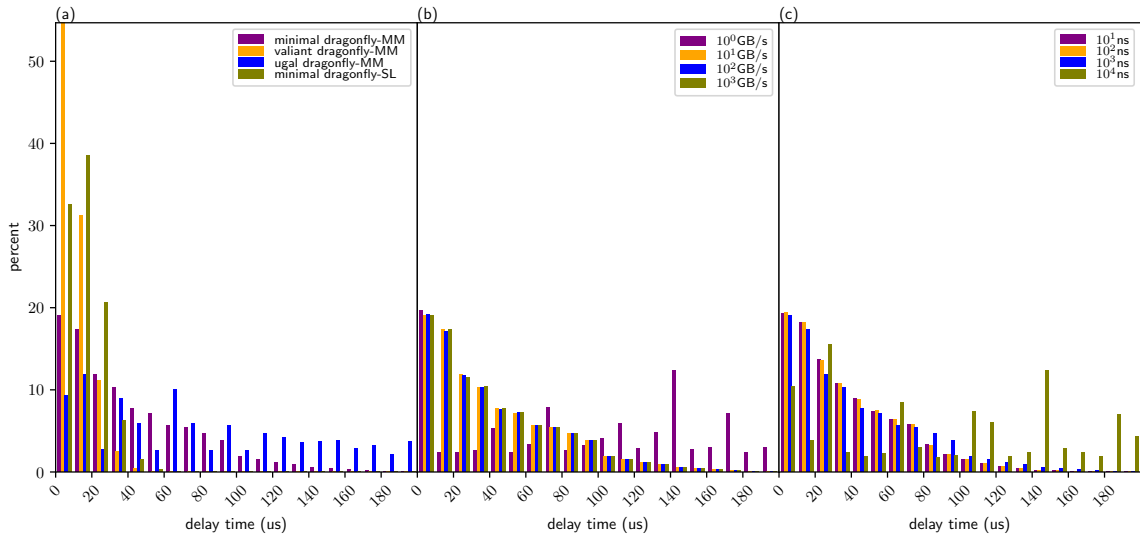

Fig. 8: Distribution of delayed events of transposition for the spectral transform method with  $10^4$  MPI processes using (a) different routing algorithms and topology configurations, (b) different bandwidths, and (c) different latencies, simulated by SST/macro.

526 is used. In Fig. 9a, the communication time of the halo exchange decreases more slowly as the  
527 number of processes increases than that of transposition for the spectral transform method.  
528 This is because the message size decreases more slowly than that of transposition owing to  
529 the fixed width of the halo (figure omitted). If the communication time of the transposition  
530 (halo exchange) continues its decreasing (increasing) trend in Fig. 9a, they meet at certain  
531 number of MPI processes; then, the communication time of the halo exchange is larger than  
532 that of the transposition. In addition, it can be seen that the wider the halo, the longer the  
533 communication time. The halo exchange of a thin halo of 3 grid points, for such as the 6th  
534 order central difference  $F'_i = \frac{-F_{i-3}+9F_{i-2}-45F_{i-1}+45F_{i+1}-9F_{i+2}+F_{i+3}}{60\Delta}$  (the red line in Fig. 9a), is  
535 significantly faster than that of wide halo for the SL method (green and blue lines in Fig. 9a).  
536 Thus, the efficiency of the SL method is counteracted by the overhead of the wide halo exchange  
537 where the width of the halo is determined by the maximum wind speed. Wide halo exchange  
538 for the SL method is expensive at exascale, especially for the atmospheric chemistry models  
539 where a large number of tracers need to be transported. On-demand exchange is a way to  
540 reduce the communication of halo exchange for the SL method, and will be investigated in a  
541 future study.

542 Significant differences in the communication times of the wide halo exchange of 20 grid  
543 points for topology torus-L, fattree-L, and dragonfly-ML are shown in Fig. 9b. It can be  
544 seen that topology torus-L performs the worst, fattree-L is the best, and the performance of  
545 dragonfly-ML is between that of torus-L and fattree-L. The communication time of the wide



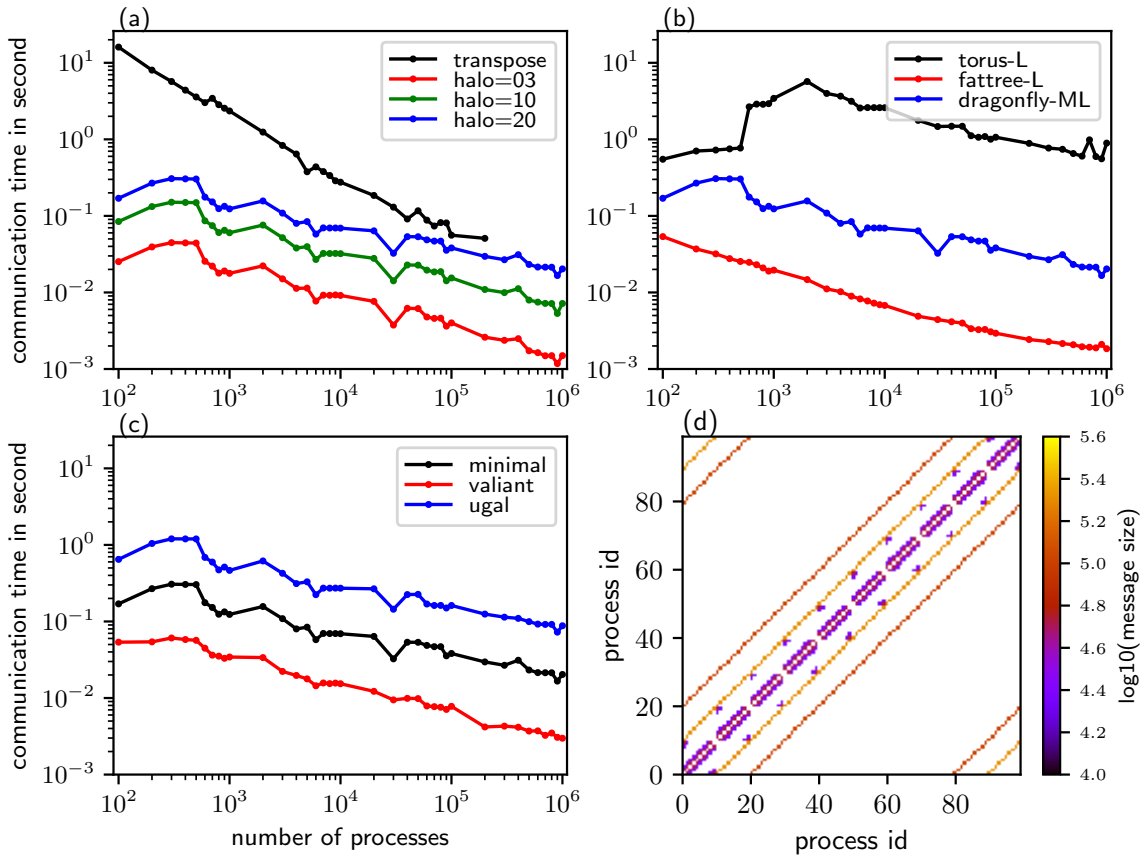

Fig. 9: (a) is the communication times of the halo exchange with a halo of 3 (red line), 10 (green line), and 20 (blue line) grid points, and the communication time of transposition for the spectral transform method is shown for comparison (black line). (b) is the communication times of the halo exchange with a halo of 20 grid points for the topology of torus-L (black line), fattree-L (red line), and dragonfly-ML (blue line). (c) is the communication times of the halo exchange with a halo of 20 grid points for the routing algorithm of minimal (black line), valiant (red line), and ugal (blue line). (d) illustrates the communication pattern of the halo exchange with a wide halo. [The circle markers in \(a\)–\(c\) indicate the numbers of processes of the corresponding simulations.](#)

546 halo exchange of 20 grid points for the topology tour-L abruptly increases at approximately  $10^3$   
 547 MPI processes, and then gradually decreases when the number of MPI tasks becomes larger  
 548 than  $3 \times 10^3$  MPI processes. The impact of the routing algorithm on the communication time  
 549 of the wide halo exchange of 20 grid points (Fig. 9c) is the same as on that of transposition  
 550 (Fig. 5d): the routing algorithm valiant performs the best, the routing algorithm ugal performs  
 551 the worst, and the routing algorithm minimal is between valiant and ugal.

#### 552 4.4 Allreduce in Krylov Subspace Methods for the Semi-Implicit Method

553 If, in average, the GCR with a restart number  $k = 3$  is convergent with  $N = 25$  iterations, the  
 554 number of allreduce calls is  $2 \times N = 50$ . The black and blue lines are the communication times

555 of 50 allreduce operations using MPI\_Allreduce and the recursive-k algorithm, respectively;  
 556 that is, the estimated communication time of one single GCR call (Fig. 10a). Contrary to that  
 557 of transposition, the communication time of GCR increases as the number of MPI processes  
 558 increases. Following the trend, the communication of a single GCR call may be similar to or  
 559 even larger than that of a single transposition when the number of MPI processes approaches  
 560 to or is beyond one million. Although it is believed that the spectral method does not scale  
 561 well owing to its time-consuming transposition, it does not suffer from this expensive allreduce  
 562 operation for the SI method because of its mathematical advantage that spherical harmonics are  
 563 the eigenfunctions of Helmholtz operators. In this sense, a grid-point model with the SI method  
 564 in which the three-dimensional Helmholtz equation is solved by Krylov subspace methods may  
 565 also not scale well at exascale unless the overhead of allreduce communication can be mitigated  
 566 by overlapping it with computation (Sanan et al., 2016).

567 Fig. 10b shows the communication times of allreduce operations using the recursive-k algo-  
 568 rithm on the topologies of torus-L, fattree-L, and dragonfly-ML. The impact of topology on the  
 569 communication performance of allreduce operations is obvious. The topology of torus-L has the  
 570 best performance, but is similar to that of dragonfly-ML for more than  $5 \times 10^5$  MPI processes;  
 571 and fattree-L has the worst performance. However, the impact of three routing algorithms  
 572 (minima, valiant, and ugal) for the dragonfly-ML topology has a negligible impact on the com-  
 573 munication performance of allreduce operations (figure omitted); this may be because of the  
 574 tiny messages (only 3 doubles for the restart number  $k = 3$ ) communicated by the allreduce  
 575 operation.

576 One advantage of the recursive-k algorithm of the allreduce operation is that the radix  $k$   
 577 can be selected to reduce the stages of communication by making full use of the bandwidth  
 578 of the underlying interconnect network. We repeat the experiment, whose configuration is  
 579 as that of the blue line in Fig. 10a, for the proper radix  $k \in [2, 32]$ , and the optimal radix  
 580 is that with the lowest communication time for a given number of MPI processes. For each  
 581 number of MPI processes, there is an optimal radix. The statistics of all the optimal radices are  
 582 shown in Fig. 10c. It can be seen that the minimum and maximum optimal radices are 5 and  
 583 32, respectively. Thus, the recursive doubling algorithm that is equivalent to the recursive-k  
 584 algorithm with radix  $k=2$  is not efficient since the optimal radix is at least 5. The median  
 585 number of optimal radices is approximately 21, and the mean number is less than but very  
 586 close to the median number. We cannot derive an analytic formula for the optimal radix since

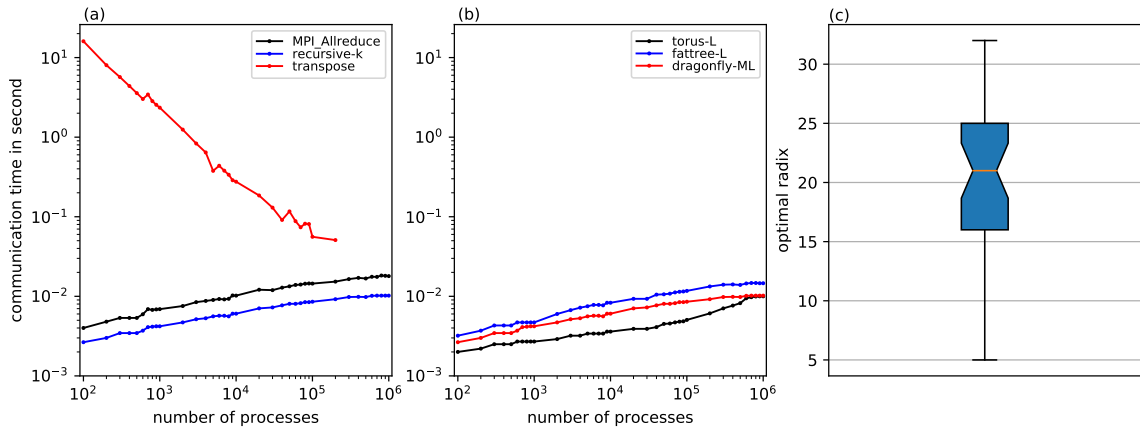

Fig. 10: (a) is the communication times of the allreduce operation using the MPI\_Allreduce (black line) and the recursive-k algorithm (blue line), and the communication time of transposition for the spectral transform method is shown for comparison (red line). (b) is the communication times of the allreduce operation using the recursive-k algorithm for the topology torus-L (black line), fattree-L (blue line), and dragonfly-ML (red line). (c) is the statistics of the optimal radices for the recursive-k algorithm. The circle markers in (a)–(b) indicate the numbers of processes of the corresponding simulations.

587 modelling the congestion is difficult in an analytic model. However, for a given resolution of  
 588 NWP model and a given HPC system, fortunately, the number of processes, bandwidth, and  
 589 latency are fixed; thus, it is easy to perform experiments to obtain the optimal radix.

## 590 5 Conclusion and Discussion

591 This work shows that it is possible to make simulations of the MPI patterns commonly used in  
 592 NWP models using very large numbers of MPI tasks. This enables the possibility to examine  
 593 and compare the impact of different factors such as latency, bandwidth, routing and network  
 594 topology on response time. We have provided an assessment of the performance and scalability  
 595 of three key MPI operations in an atmospheric model at exascale by simulating their skeleton  
 596 programs on an SST/macro simulator. After optimization of the memory and efficiency of  
 597 the SST/macro simulator and construction of the skeleton programs, a series of experiments  
 598 was carried out to investigate the impacts of the collective algorithm, the topology and its  
 599 configuration, the routing algorithm, the bandwidth, and the latency on the performance and  
 600 scalability of transposition, halo exchange, and allreduce operations. The experimental results  
 601 show that:

- 602 1. The collective algorithm is extremely important for the performance and scalability of  
 603 key MPI operations in the atmospheric model at exascale because a good algorithm can

604 make full use of the bandwidth and reduce the stages of communication. The generalized  
605 ring-k algorithm for the alltoally operation and the generalized recursive-k algorithm for  
606 the allreduce operation proposed herein perform the best.

- 607 2. Topology, its configuration, and the routing algorithm have a considerable impact on the  
608 performance and scalability of communications. The fattree topology usually performs  
609 the best, but its scalability becomes weak with a large number of MPI processes. The  
610 dragonfly topology balances the performance and scalability well, and can maintain almost  
611 the same scalability with a large number of MPI processes. The configurations of the  
612 dragonfly topology indicate that a proper configuration can be used to avoid the hotspots  
613 of congestion and lead to good performance. The minimal routing algorithm is intuitive  
614 and performs well. However, the valiant routing algorithm (which randomly chooses an  
615 intermediate node to uniformly disperse the communication over the network to avoid  
616 the hotspot/bottleneck of congestion) performs much better for heavy congestion.
- 617 3. Although they have an important impact on communication, bandwidth and latency  
618 cannot be infinitely grown and reduced owing to the limitation of hardware, respectively.  
619 Thus, it is important to design innovative algorithms to make full use of the bandwidth  
620 and to reduce the effect of latency.
- 621 4. It is generally believed that the transposition for the spectral transform method, which is  
622 a multiple simultaneous all-to-all personalized communication, poses a great challenge to  
623 the scalability of the spectral model. This work shows that the scalability of the spectral  
624 model is still acceptable in terms of [MPI](#) transposition. However, the wide halo exchange  
625 for the Semi-Lagrangian method and the allreduce operation in the GCR iterative solver  
626 for the Semi-Implicit method, both of which are often adopted by the grid-point model,  
627 also suffer the stringent challenge of scalability at exascale.

628 In summary, both software (algorithms) and hardware (characteristics and configuration)  
629 are of great importance to the performance and scalability of the atmospheric model at exascale.  
630 The software and hardware must be co-designed to address the challenge of the atmospheric  
631 model for exascale computing.

632 As shown previously, the communications of the wide halo exchange for the Semi-Lagrangian  
633 method and the allreduce operation in the GCR iterative solver for the Semi-Implicit method

634 are expensive at exascale. The on-demand halo exchange for the Semi-Lagrangian and the  
635 pipeline technique to overlap the communication with the computation for the GCR iterative  
636 solver are not researched in this study and should be investigated. All the computed nodes  
637 in this work only contain one single-core CPU, which is good for assessing the communication  
638 of the interconnect network; however, ~~it is now very common for one CPU with multi-cores~~  
639 ~~or even many-cores~~ the architectures of current and futures supercomputers are multi-core and  
640 multi-socket nodes, even non-CPU architectures. These more complex hierarchies seem to  
641 complicate the inter-process communications. However, an MPI rank can be bound to any core  
642 for multi-core and multi-socket nodes; with INTEL MPI library, an MPI rank can be bound  
643 to any processor/co-processor for MIC architectures such as Xeon Phi; with CUDA-aware  
644 MPI, an MPI rank can be bound to a CPU core but can communicated with GPUs for GPU  
645 architectures. Because A multi-core node behaves more or less like a more powerful single  
646 core node when the OpenMP is used for the intra-node parallelization, the conclusions in this  
647 study could be generalized to the complex hierarchical system. Multiple MPI processes per  
648 node may be good for the local pattern communication such as thin halo exchange since the  
649 shared memory communication mechanism is used, but may result in ~~heavy~~ congestion in  
650 the network interface controller for ~~all-to-all communication~~ inter-node communication. The  
651 congestion can be mitigated even eliminated if more network interface controllers per node or a  
652 network interface controller with multi-ports (such as a mini-switch) in a node. From this point  
653 of view, the conclusions should still be valid for the complex hierarchical architecutres, but the  
654 scalability might be affected. The more MPI processes, the less computation per node without  
655 limitation if there is only one single-core CPU per node, thus, computation is not considered  
656 in this paper. However, the bandwidth of memory limits the performance and scalability of  
657 computation for multi-core or many-core systems. The assessment of computation currently  
658 underway and a detailed paper will be presented separately; the purpose of this subsequent  
659 study is to model the time response of a time step of a model such as the regional model  
660 (AROME) used by Météo-France.

## 661 Code Availability

662 The code of the SST/macro simulator is publicly available at [https://github.com/sstsimulator/sst-](https://github.com/sstsimulator/sst-macro)  
663 macro. The skeleton programs, scripts, and our modified version of SST/macro 7.1.0 for the

664 simulations presented the paper are available at <https://doi.org/10.5281/zenodo.1066934>.

## 665 **Competing Interests**

666 The authors declared no competing interests.

## 667 **Acknowledgements**

668 This work was supported by Centre National de Recherches Météorologiques, Météo France  
669 within the ESCAPE (Energy-efficient Scalable Algorithms for Weather Prediction at Exascale)  
670 project.

## 671 **References**

- 672 Acun, B., N. Jain, A. Bhatele, M. Mubarak, C. D. Carothers, and L. V. Kale. *Preliminary*  
673 *Evaluation of a Parallel Trace Replay Tool for HPC Network Simulations*, pages 417–429.  
674 Springer International Publishing, Cham, 2015. ISBN 978-3-319-27308-2.
- 675 Ajima, Y., S. Sumimoto, and T. Shimizu, Nov 2009: Tofu: A 6d mesh/torus interconnect for  
676 exascale computers. *Computer*, **42**(11), 36–40.
- 677 Alverson, B., E. Froese, L. Kaplan, and D. Roweth. *Cray XC Series Network*. Cray Inc., 2015.
- 678 Barros, S. R. M., D. Dent, L. Isaksen, G. Robinson, G. Mozdzyński, and F. Wollenweber, 1995:  
679 The IFS model: a parallel production weather code. *Parallel Comput.*, **21**, 1621–1638.
- 680 Bauer, P., A. Thorpe, and G. Brunet, 2015: The quiet revolution of numerical weather predic-  
681 tion. *Nature*, **525**(7567), 47–55.
- 682 Böhm, S. and C. Engelmann. xsim: The extreme-scale simulator. In *2011 International Con-*  
683 *ference on High Performance Computing Simulation*, pages 280–286, July 2011.
- 684 Casanova, H., A. Gupta, and F. Suter, 2015: Toward more scalable off-line simulations of mpi  
685 applications. *Parallel Processing Letters*, **25**(03), 1541002.
- 686 Dechev, D. and T. H. Ahn, 2013: Using sst/macro for effective analysis of mpi-based applica-  
687 tions: Evaluating large-scale genomic sequence search. *IEEE Access*, **1**, 428–435.

688 Degomme, A., A. Legrand, G. S. Markomanolis, M. Quinson, M. Stillwell, and F. Suter, 2017:  
689 Simulating MPI Applications: The SMPI Approach. *IEEE Transactions on Parallel and*  
690 *Distributed Systems*, **28**(8), 2387–2400.

691 Dubos, T., S. Dubey, M. Tort, R. Mittal, Y. Meurdesoif, and F. Hourdin, 2015: DYNAMICO-  
692 1.0, an icosahedral hydrostatic dynamical core designed for consistency and versatility.  
693 *Geosci. Model Dev.*, **8**, 3131–3150.

694 Ehrendorfer, M., 2012: *Spectral numerical weather prediction models*. SIAM.

695 Eisenstat, S. C., H. C. Elman, and M. H. Schultz, 1983: Variational iterative methods for  
696 nonsymmetric systems of linear equations. *SIAM J. Numer. Anal.*, **20**(2), 345–357.

697 Engelmann, C., 2014: Scaling to a million cores and beyond: using light-weight simulation  
698 to understand the challenges ahead on the road to exascale. *Future Generation Computer*  
699 *Systems*, **30**(0), 59–65.

700 Hoefler, T., T. Schneider, and A. Lumsdaine. LogGOPSim - Simulating Large-Scale Appli-  
701 cations in the LogGOPS Model. In *Proceedings of the 19th ACM International Symposium*  
702 *on High Performance Distributed Computing*, pages 597–604. ACM, Jun. 2010. ISBN 978-1-  
703 60558-942-8.

704 Hortal, M., 2002: The development and testing of a new two-time-level semi-Lagrangian scheme  
705 (SETTLES) in the ECMWF forecast model. *Q. J. R. Meteorol. Soc.*, **128**, 1671–1687.

706 Hoskins, B. J. and A. J. Simmons, 1975: A multi-layer spectral model and the semi-implicit  
707 method. *Q. J. R. Meteorol. Soc.*, **101**, 637–655.

708 Jain, N., A. Bhatele, S. White, T. Gamblin, and L. V. Kale. Evaluating hpc networks via  
709 simulation of parallel workloads. In *SC16: International Conference for High Performance*  
710 *Computing, Networking, Storage and Analysis*, pages 154–165, Nov 2016.

711 Janssen, C. L., H. Adalsteinsson, S. Cranford, J. P. Kenny, A. Pinar, D. A. Evensky, and  
712 J. Mayo, 2010: A Simulator for Large-Scale Parallel Computer Architectures. *International*  
713 *Journal of Distributed Systems and Technologies*, **1**(2), 57–73.

714 Juang, H. H., S. Hong, , and M. Kanamitsu, 1997: The NCEP regional spectral model: an  
715 update. *Bull. Am. Meteorol. Soc.*, **78**(10), 2125–2143.

716 Kanamitsu, M., H. Kanamaru, Y. Cui, and H. Juang. Parallel implementation of the regional  
717 spectral atmospheric model. Technical report, Scripps Institution of Oceanography, Univer-  
718 sity of California at San Diego, and National Oceanic and Atmospheric Administration for  
719 the California Energy Commission, PIER Energy-Related Environmental Research, 2005.  
720 CEC-500-2005-014.

721 Kim, J., W. J. Dally, S. Scott, and D. Abts. Technology-driven, highly-scalable dragonfly  
722 topology. In *2008 International Symposium on Computer Architecture*, pages 77–88, June  
723 2008.

724 Kuhnlein, C. and P. K. Smolarkiewicz, 2017: An unstructured-mesh finite-volume MPDATA  
725 for compressible atmospheric dynamics. *J. Comput. Phys.*, **334**, 16–30.

726 Lagadapati, M., F. Mueller, and C. Engelmann. Benchmark generation and simulation at  
727 extreme scale. In *2016 IEEE/ACM 20th International Symposium on Distributed Simulation  
728 and Real Time Applications (DS-RT)*, pages 9–18, Sept 2016.

729 Leiserson, C. E., Oct 1985: Fat-trees: Universal networks for hardware-efficient supercomput-  
730 ing. *IEEE Transactions on Computers*, **C-34**(10), 892–901.

731 Li, L., W. Xue, R. Ranjan, and Z. Jin, 2013: A scalable Helmholtz solver in GRAPES over  
732 large-scale multicore cluster. *Concurrency Computat.: Pract. Exper.*, **25**, 1722–1737.

733 Lin, S.-J., 2004: A "vertically Lagrangian" finite-volume dynamical core for global models.  
734 *Mon. Wea. Rev.*, **132**, 2293–2307.

735 Mubarak, M., C. D. Carothers, R. B. Ross, and P. Carns, January 2017: Enabling parallel  
736 simulation of large-scale hpc network systems. *IEEE Trans. Parallel Distrib. Syst.*, **28**(1),  
737 87–100.

738 Noeth, M., P. Ratn, F. Mueller, M. Schulz, and B. R. de Supinski, 2009: Scalatrace: Scalable  
739 compression and replay of communication traces for high-performance computing. *Journal  
740 of Parallel and Distributed Computing*, **69**(8), 696 – 710.

741 Núñez, A., J. Fernández, J. D. Garcia, F. Garcia, and J. Carretero, Jan 2010: New techniques  
742 for simulating high performance mpi applications on large storage networks. *The Journal of  
743 Supercomputing*, **51**(1), 40–57.



744 Qaddouri, A. and V. Lee, 2011: The Canadian global environmental multiscale model on the  
745 Yin-Yang grid system. *Q. J. R. Meteorol. Soc.*, **137**, 1913–1926.

746 Ritchie, H., 1995: Implementation of the Semi-Lagrangian Method in a High-Resolution Version  
747 of the ECMWF forecast model. *Mon. Wea. Rev.*, **123**, 489–514.

748 Robert, A., J. henderson, and C. Turnbull, 1972: An implicit time integration scheme for  
749 baroclinic models of the atmosphere. *Mon. Wea. Rev.*, **100**, 329–335.

750 Sanan, P., S. M. Schnepp, and D. A. May, 2016: Pipelined, flexible krylov subspace methods.  
751 *SIAM J. Sci. Comput.*, **38**(5), C441–C470.

752 Sandbach, S., J. Thuburn, D. Vassilev, and M. G. Duda, 2015: A Semi-Implicit version fo the  
753 MPAS-atmosphere dynamical core. *Mon. Wea. Rev.*, **143**, 3838–3855.

754 Satoh, M., T. Matsuno, H. Tomita, H. Miura, T. Nasuno, and S. Iga, 2008: Nonhydrostatic  
755 icosahedral atmospheric model (NICAM) for global cloud resolving simulations. *J. Comput.*  
756 *Phys.*, **227**, 3486–3514.

757 Seity, Y., P. Brousseau, S. Malardel, G. Hello, P. Bénard, F. Bouttier, C. Lac, and V. Masson,  
758 2011: The AROME-France convective-scale operational model. *Mon. Wea. Rev.*, **139**, 976–  
759 991.

760 Skamarock, W. C., J. B. Klemp, M. G. Duda, L. D. Fowler, and S.-H. Park, 2012: A mul-  
761 tiscala nonhydrostatic atmospheric model using centroidal voronoi tesslations and C-grid  
762 staggering. *Mon. Wea. Rev.*, **140**, 3090–3105.

763 SNL, L. C. *SST/macro 7.1: User’s Manual*. Sandia National Labs, Livermore, CA, Jun 2017.

764 Staniforth, A. and J. Côté, 1991: Semi-Lagrangian integration schemes for atmospheric models–  
765 a review. *Mon. Wea. Rev.*, **119**, 2206–2223.

766 Temperton, C., 1983: Self-sorting mixed-radix fast Fourier transforms. *J. Comput. Phys.*, **52**,  
767 1–23.

768 Thakur, R., R. Rabenseifner, and W. Gropp, February 2005: Optimization of collective com-  
769 munication operations in mpich. *Int. J. High Perform. Comput. Appl.*, **19**(1), 49–66.

- 770 Tikir, M. M., M. A. Laurenzano, L. Carrington, and A. Snavely. *PSINS: An Open Source*  
771 *Event Tracer and Execution Simulator for MPI Applications*, pages 135–148. Springer Berlin  
772 Heidelberg, Berlin, Heidelberg, 2009.
- 773 Wedi, N. P., M. Hamrud, and G. Mozdzynski, 2013: A fast spherical harmonics transform for  
774 global NWP and climate models. *Mon. Wea. Rev.*, **141**, 3450–3461.
- 775 Wedi, N. P., 2014: Increasing horizontal resolution in numerical weather prediction and climate  
776 simulations: illusion or panacea? *Phil. Trans. R. Soc. A*, **372**, 20130289.
- 777 Wike, J. J. and J. P. Kenny. Using Discrete Event Simulation for Programming Model Ex-  
778 ploration at Extreme-Scale: Macroscale Components for the Structural Simulation Toolkit  
779 (SST). Technical report, Sandia National Laboratories, 2014. SAND2015-1027.
- 780 Wolfe, N., C. D. Carothers, M. Mubarak, R. Ross, and P. Carns. Modeling a million-node slim  
781 fly network using parallel discrete-event simulation. In *Proceedings of the 2016 Annual ACM*  
782 *Conference on SIGSIM Principles of Advanced Discrete Simulation*, pages 189–199. ACM,  
783 2016.
- 784 Zahavi, E., G. Johnson, D. J. Kerbyson, and M. Lang, 2010: Optimized infiniband<sup>TM</sup> fat-tree  
785 routing for shift all-to-all communication patterns. *Concurrency and Computation: Practice*  
786 *and Experience*, **22**(2), 217–231.
- 787 Zangl, G., D. Reinert, P. Ripodas, and M. Baldauf, 2015: The ICON (icosahedral non-  
788 hydrostatic) modelling framework of DWD and MPI-M: description of the non-hydrostatic  
789 dynamical core. *Q. J. R. Meteorol. Soc.*, **141**, 563–579.
- 790 Zerroukat, M. and T. Allen, 2012: A three-dimensional monotone and conservative semi-  
791 Lagrangian scheme (SLICE-3D) for transport problems. *Q. J. R. Meteorol. Soc.*, **138**, 1640–  
792 1651.
- 793 Zheng, G., G. Kakulapati, and L. V. Kale. Bigsim: a parallel simulator for performance  
794 prediction of extremely large parallel machines. In *18th International Parallel and Distributed*  
795 *Processing Symposium, 2004. Proceedings.*, pages 78–, April 2004.
